# Supplementary material for: Identification and validation of apoptosis-related genes in acute myocardial infarction based on integrated bioinformatics methods
Source: PeerJ journal article supplement (doi:10.7717/peerj.18591), 2024-12-04
Supplement: MIQE_checklist.pdf [file MIQE_checklist.pdf]

| ITEM TO CHECK                                                        | IMPORTANCE | CHECKLIST |
|----------------------------------------------------------------------|------------|-----------|
| <b>EXPERIMENTAL DESIGN</b>                                           |            |           |
| Definition of experimental and control groups                        | E          | Line 249  |
| Number within each group                                             | E          | Line 249  |
| Assay carried out by core lab or investigator's lab?                 | D          |           |
| Acknowledgement of authors' contributions                            | D          |           |
| <b>SAMPLE</b>                                                        |            |           |
| Description                                                          | E          |           |
| Volume/mass of sample processed                                      | D          |           |
| Microdissection or macrodissection                                   | E          | Line 256  |
| Processing procedure                                                 | E          |           |
| If frozen - how and how quickly?                                     | E          | Line 256  |
| If fixed - with what, how quickly?                                   | E          |           |
| Sample storage conditions and duration (especially for FFPE samples) | E          | Line 256  |
| <b>NUCLEIC ACID EXTRACTION</b>                                       |            |           |
| Procedure and/or instrumentation                                     | E          |           |
| Name of kit and details of any modifications                         | E          | Line 274  |
| Source of additional reagents used                                   | D          |           |
| Details of DNase or RNase treatment                                  | E          | Line 275  |
| Contamination assessment (DNA or RNA)                                | E          | Line 275  |
| Nucleic acid quantification                                          | E          | Line 275  |
| Instrument and method                                                | E          | Line 276  |
| Purity (A260/A280)                                                   | D          |           |
| Yield                                                                | D          |           |
| RNA integrity method/instrument                                      | E          | Line 276  |
| RIN/RQI or Cq of 3' and 5' transcripts                               | E          | Line 276  |
| Electrophoresis traces                                               | D          |           |
| Inhibition testing (Cq dilutions, spike or other)                    | E          |           |
| <b>REVERSE TRANSCRIPTION</b>                                         |            |           |
| Complete reaction conditions                                         | E          |           |
| Amount of RNA and reaction volume                                    | E          | Line 277  |
| Priming oligonucleotide (if using GSP) and concentration             | E          | Line 277  |
| Reverse transcriptase and concentration                              | E          | Line 277  |
| Temperature and time                                                 | E          | Line 277  |
| Manufacturer of reagents and catalogue numbers                       | D          |           |
| Cqs with and without RT                                              | D*         |           |
| Storage conditions of cDNA                                           | D          |           |
| <b>qPCR TARGET INFORMATION</b>                                       |            |           |
| If multiplex, efficiency and LOD of each assay.                      | E          |           |
| Sequence accession number                                            | E          |           |
| Location of amplicon                                                 | D          |           |
| Amplicon length                                                      | E          |           |
| <i>In silico</i> specificity screen (BLAST, etc)                     | E          |           |
| Pseudogenes, retropseudogenes or other homologs?                     | D          |           |
| Sequence alignment                                                   | D          |           |
| Secondary structure analysis of amplicon                             | D          |           |
| Location of each primer by exon or intron (if applicable)            | E          |           |
| What splice variants are targeted?                                   | E          |           |
| <b>qPCR OLIGONUCLEOTIDES</b>                                         |            |           |
| Primer sequences                                                     | E          | Line 282  |
| RTPrimerDB Identification Number                                     | D          |           |
| Probe sequences                                                      | D**        |           |
| Location and identity of any modifications                           | E          | Line 282  |
| Manufacturer of oligonucleotides                                     | D          |           |
| Purification method                                                  | D          |           |
| <b>qPCR PROTOCOL</b>                                                 |            |           |
| Complete reaction conditions                                         | E          |           |
| Reaction volume and amount of cDNA/DNA                               | E          | Line 279  |
| Primer, (probe), Mg++ and dNTP concentrations                        | E          | Line 279  |
| Polymerase identity and concentration                                | E          | Line 279  |
| Buffer/kit identity and manufacturer                                 | E          | Line 279  |
| Exact chemical constitution of the buffer                            | D          |           |
| Additives (SYBR Green I, DMSO, etc.)                                 | E          | Line 279  |
| Manufacturer of plates/tubes and catalog number                      | D          |           |
| Complete thermocycling parameters                                    | E          | Line 279  |
| Reaction setup (manual/robotic)                                      | D          |           |
| Manufacturer of qPCR instrument                                      | E          | Line 279  |
| <b>qPCR VALIDATION</b>                                               |            |           |
| Evidence of optimisation (from gradients)                            | D          |           |
| Specificity (gel, sequence, melt, or digest)                         | E          | Line 279  |
| For SYBR Green I, Cq of the NTC                                      | E          | Line 279  |
| Standard curves with slope and y-intercept                           | E          | Line 279  |
| PCR efficiency calculated from slope                                 | E          | Line 279  |
| Confidence interval for PCR efficiency or standard error             | D          |           |
| r2 of standard curve                                                 | E          | Line 279  |
| Linear dynamic range                                                 | E          | Line 279  |
| Cq variation at lower limit                                          | E          | Line 279  |
| Confidence intervals throughout range                                | D          |           |
| Evidence for limit of detection                                      | E          |           |
| If multiplex, efficiency and LOD of each assay.                      | E          |           |
| <b>DATA ANALYSIS</b>                                                 |            |           |
| qPCR analysis program (source, version)                              | E          | Line 281  |
| Cq method determination                                              | E          |           |
| Outlier identification and disposition                               | E          |           |
| Results of NTCs                                                      | E          |           |
| Justification of number and choice of reference genes                | E          |           |
| Description of normalisation method                                  | E          |           |
| Number and concordance of biological replicates                      | D          |           |
| Number and stage (RT or qPCR) of technical replicates                | E          |           |
| Repeatability (intra-assay variation)                                | E          |           |
| Reproducibility (inter-assay variation, %CV)                         | D          |           |
| Power analysis                                                       | D          |           |
| Statistical methods for result significance                          | E          |           |
| Software (source, version)                                           | E          |           |
| Cq or raw data submission using RDML                                 | D          |           |

**Table 1.** MIQE checklist for authors, reviewers and editors. All essential information (E) must be submitted with the manuscript. Desirable information (D) should be submitted if available. If using primers obtained from RTPrimerDB, information on qPCR target, oligonucleotides, protocols and validation is available from that source.

\*: Assessing the absence of DNA using a no RT assay is essential when first extracting RNA. Once the sample has been validated as RDNA-free, inclusion of a no-RT control is desirable, but no longer essential.

\*\*:: Disclosure of the probe sequence is highly desirable and strongly encouraged. However, since not all commercial pre-designed assay vendors provide this information, it cannot be an essential requirement. Use of such assays is advised against.
