# Supplementary material for: Identification and validation of apoptosis-related genes in acute myocardial infarction based on integrated bioinformatics methods
Source: PeerJ. 2024 Dec 4;12:e18591. doi: 10.7717/peerj.18591 (PMC11624842; doi:10.7717/peerj.18591)
Supplement: Supplemental Information 1 [file peerj-12-18591-s001.xls]

## Sheet: Sheet1
Genes associated with apoptosis
ADD1
AIFM3
ANKH
ANXA1
APP
ATF3
AVPR1A
BAX
BCAP31
BCL10
BCL2L1
BCL2L10
BCL2L11
BCL2L2
BGN
BID
BIK
BIRC3
BMF
BMP2
BNIP3L
BRCA1
BTG2
BTG3
CASP1
CASP2
CASP3
CASP4
CASP6
CASP7
CASP8
CASP9
CAV1
CCNA1
CCND1
CCND2
CD14
CD2
CD38
CD44
CDC25B
CDK2
CDKN1A
CDKN1B
CFLAR
CLU
CREBBP
CTH
CTNNB1
CYLD
DAP
DAP3
DCN
DDIT3
DFFA
DIABLO
DNAJA1
DNAJC3
DNM1L
DPYD
EBP
EGR3
EMP1
ENO2
ERBB2
ERBB3
EREG
ETF1
F2
F2R
FAS
FASLG
FDXR
FEZ1
GADD45A
GADD45B
GCH1
GNA15
GPX1
GPX3
GPX4
GSN
GSR
GSTM1
GUCY2D
H1-0
HGF
HMGB2
HMOX1
HSPB1
IER3
IFITM3
IFNB1
IFNGR1
IGF2R
IGFBP6
PTK2
RARA
RELA
RETSAT
RHOB
RHOT2
RNASEL
NEDD9
NEFH
PAK1
PDCD4
PDGFRB
PEA15
PLAT
PLCB2
PLPPR4
PMAIP1
PPP2R5B
PPP3R1
PPT1
PRF1
PSEN1
PSEN2
CD69
TOP2A
TSPO
TXNIP
VDAC2
WEE1
XIAP
IL18
IL1A
IL1B
IL6
IRF1
ISG20
JUN
KRT18
LEF1
LGALS3
LMNA
LUM
MADD
MCL1
MGMT
MMP2
