# Supplementary material for: Identification and validation of apoptosis-related genes in acute myocardial infarction based on integrated bioinformatics methods
Source: PeerJ. 2024 Dec 4;12:e18591. doi: 10.7717/peerj.18591 (PMC11624842; doi:10.7717/peerj.18591)
Supplement: Supplemental Information 2 [file peerj-12-18591-s002.xls]

## Sheet: Sheet1
mRNA	Forward(5'to3')	Sequence length	Reverse(5'to3')	Sequence length	GeneID	Species
GAPDH	AGTTCAACGGCACAGTCAAGG	21	ACATACTCAGCACCAGCATCAC	22	14433	Mus musculus
IL-1β	GCAACTGTTCCTGAACTCAACT	22	ATCTTTTGGGGTCCGTCAACT	21	16176	Mus musculus
GNA15	TCAGAGCGTAGGAAATGG	18	GAGGAAGAGGATGACCGA	18	14676	Mus musculus
BCL10	ATGGCGTCGTCCCTGAAC	18	GAAAGAGCCCGTGACCGT	18	12042	Mus musculus
PMAIP1	CTGAGATGCCCGGGAGAAAG	20	TGCGCCAGAACCACAGTTAT	20	58801	Mus musculus
CDKN1A	ACCTGATGATACCCAACTAC	20	CTGTGGCACCTTTTATTCTG	20	12575	Mus musculus
CD14	CCGACCCTCCAAGTTTTA	18	CAGCATCCCGCAGTGAAT	18	12475	Mus musculus
