# Supplementary material for: Identification and validation of apoptosis-related genes in acute myocardial infarction based on integrated bioinformatics methods
Source: PeerJ. 2024 Dec 4;12:e18591. doi: 10.7717/peerj.18591 (PMC11624842; doi:10.7717/peerj.18591)
Supplement: Supplemental Information 5 [file peerj-12-18591-s005.xls]

## Sheet: Sheet1
Genes	logFC	AveExpr	t	P.Value	adj.P.Val	B
S100A12	2.12707	8.94989	9.36306	6.93e-17	1.63e-12	27.5573
NFIL3	1.80481	8.46877	9.17325	2.21e-16	2.59e-12	26.4547
S100A9	1.58096	10.5298	8.57248	8.2e-15	5.26e-11	23.0097
ACSL1	1.62524	9.09006	8.55765	8.95e-15	5.26e-11	22.9256
PLAUR	1.61661	7.91617	8.45503	1.65e-14	7.74e-11	22.3453
IL1R2	1.86918	8.17131	8.32224	3.61e-14	1.41e-10	21.598
THBD	1.54098	6.7925	8.24903	5.55e-14	1.86e-10	21.1879
TLR2	1.4809	8.16361	8.03542	1.93e-13	5.67e-10	19.9993
DYSF	1.40962	7.62166	8.00144	2.35e-13	6.14e-10	19.8114
AQP9	1.79665	8.53447	7.93234	3.51e-13	8.25e-10	19.4302
NAMPT	1.64723	8.4091	7.84585	5.78e-13	1.23e-09	18.9551
MGP	1.62029	5.95749	7.80895	7.14e-13	1.4e-09	18.753
IL1B	1.86421	8.6307	7.74827	1.01e-12	1.83e-09	18.4216
SERPINA1	1.91487	8.17331	7.65412	1.73e-12	2.88e-09	17.9097
ZFP36	1.20348	10.3222	7.63891	1.89e-12	2.88e-09	17.8273
PIM3	0.776149	10.0024	7.62244	2.07e-12	2.88e-09	17.7381
GLT1D1	1.30814	7.25108	7.62169	2.08e-12	2.88e-09	17.734
CSF3R	1.52876	7.76468	7.47415	4.8e-12	6.27e-09	16.939
CDA	1.17084	6.52792	7.43212	6.08e-12	7.52e-09	16.7138
BST1	1.43263	6.83723	7.39396	7.53e-12	8.7e-09	16.5099
QPCT	1.46688	7.96638	7.38841	7.77e-12	8.7e-09	16.4802
ASGR2	0.788179	6.58939	7.37082	8.57e-12	8.97e-09	16.3865
IL1RN	1.74322	9.12256	7.36667	8.77e-12	8.97e-09	16.3643
ITLN1	1.80163	6.57819	7.32444	1.11e-11	1.09e-08	16.1396
PYGL	1.38682	7.85315	7.31404	1.18e-11	1.11e-08	16.0844
SLC2A14 /// SLC2A3	1.09056	8.81795	7.30325	1.25e-11	1.13e-08	16.0271
CMTM2	1.39857	8.6116	7.28142	1.41e-11	1.23e-08	15.9113
ICAM1	1.3573	7.34317	7.22796	1.9e-11	1.6e-08	15.6286
GAB2	0.944221	7.87017	7.16003	2.77e-11	2.24e-08	15.2708
S100P	1.54511	8.80566	7.11277	3.59e-11	2.82e-08	15.0229
TREM1	1.66054	7.79948	6.98422	7.27e-11	5.34e-08	14.3526
FCN1	1.33441	8.25646	6.98361	7.29e-11	5.34e-08	14.3494
PLBD1	1.53523	8.98035	6.97856	7.5e-11	5.34e-08	14.3232
CREB5 /// LOC401317	1.24892	6.73946	6.96132	8.23e-11	5.69e-08	14.2339
GABARAPL1	0.926876	7.6502	6.94096	9.2e-11	6.18e-08	14.1285
C5AR1	1.53037	8.82556	6.89093	1.21e-10	7.59e-08	13.8702
CLEC4D	1.62043	6.33443	6.88957	1.22e-10	7.59e-08	13.8632
BCL2A1	1.33359	10.4792	6.88795	1.23e-10	7.59e-08	13.8548
S100A8	1.40941	12.0226	6.8455	1.54e-10	8.95e-08	13.6365
ADM	1.49046	8.26583	6.84431	1.55e-10	8.95e-08	13.6304
ANXA3	1.47656	6.27398	6.84339	1.56e-10	8.95e-08	13.6256
LRG1	1.04103	6.42903	6.82553	1.72e-10	9.62e-08	13.534
DDIT3	1.17441	7.76355	6.80854	1.88e-10	1.03e-07	13.4469
KCNJ15	1.52255	7.27884	6.80451	1.93e-10	1.03e-07	13.4263
NFKBIA	1.1096	10.4415	6.79866	1.99e-10	1.04e-07	13.3964
JUNB	0.626574	9.65171	6.7395	2.73e-10	1.4e-07	13.0944
CD36	1.46614	7.32154	6.73171	2.85e-10	1.42e-07	13.0548
GNA15	0.777695	6.41997	6.72706	2.92e-10	1.43e-07	13.0311
MGAM	1.44105	8.39084	6.70883	3.22e-10	1.53e-07	12.9384
MMP9	1.08909	7.28534	6.7073	3.24e-10	1.53e-07	12.9306
ANPEP	0.931653	7.12996	6.69134	3.53e-10	1.61e-07	12.8496
PPP1R15A	1.18592	7.16021	6.68844	3.59e-10	1.61e-07	12.8349
ITPRIP	0.880981	7.87313	6.68644	3.63e-10	1.61e-07	12.8248
BCL6	1.18531	10.2033	6.6829	3.7e-10	1.61e-07	12.8068
IDI1	0.606333	10.1363	6.67327	3.89e-10	1.66e-07	12.758
FCGR2C	0.970167	8.20525	6.65767	4.23e-10	1.77e-07	12.6791
PAQR8	-0.704195	7.15098	-6.62589	5.01e-10	2.05e-07	12.5185
MCEMP1	1.00457	7.65152	6.62358	5.07e-10	2.05e-07	12.5069
CXCL16	1.2366	8.24354	6.61036	5.44e-10	2.17e-07	12.4402
HAL	1.29154	7.45732	6.53388	8.14e-10	3.19e-07	12.0561
CSTA	1.65322	9.23385	6.52678	8.46e-10	3.26e-07	12.0206
METRNL	0.790525	6.67235	6.51431	9.03e-10	3.42e-07	11.9582
LY96	0.840341	9.72998	6.48648	1.05e-09	3.9e-07	11.8193
TRIB1	0.965596	9.60113	6.47683	1.1e-09	4.03e-07	11.7712
GIMAP7	-1.05536	10.5016	-6.47415	1.12e-09	4.03e-07	11.7579
CCL20	1.42419	6.71092	6.4669	1.16e-09	4.13e-07	11.7218
TMCC3	0.834792	6.76376	6.45859	1.21e-09	4.25e-07	11.6804
RNASE2	1.47758	7.02709	6.4447	1.3e-09	4.5e-07	11.6114
GRN	0.763314	7.53142	6.43957	1.34e-09	4.55e-07	11.5859
PELI1	1.13543	9.52837	6.41427	1.53e-09	5.12e-07	11.4605
CTD-2528L19.6	-1.2273	5.52979	-6.39392	1.7e-09	5.51e-07	11.3598
NFKBIZ	1.04319	9.61176	6.39236	1.71e-09	5.51e-07	11.352
PHC2	0.727347	8.71205	6.37531	1.87e-09	5.94e-07	11.2678
CSRNP1	0.817767	8.01507	6.37122	1.91e-09	5.98e-07	11.2477
IRAK3	1.24644	6.43542	6.3503	2.13e-09	6.58e-07	11.1445
LOC339988	-0.691852	7.91334	-6.34566	2.18e-09	6.66e-07	11.1217
C9orf72	1.18696	7.31386	6.33059	2.36e-09	7.1e-07	11.0475
FCAR	1.26428	5.14288	6.32681	2.4e-09	7.15e-07	11.0289
VCAN	1.55018	7.79051	6.31658	2.53e-09	7.45e-07	10.9787
CD14	1.20314	7.97032	6.29317	2.86e-09	8.3e-07	10.8639
SIRPB1	1.24892	5.76253	6.2403	3.76e-09	1.08e-06	10.6056
HCAR3	1.46954	8.36435	6.21833	4.2e-09	1.19e-06	10.4986
RBP7	1.12663	7.83662	6.21318	4.32e-09	1.21e-06	10.4735
SECTM1	0.87298	7.13969	6.18652	4.95e-09	1.37e-06	10.3441
LOC388210 /// LOC400499	0.605796	6.65052	6.16894	5.41e-09	1.48e-06	10.2589
CD55	0.927575	9.71548	6.16614	5.49e-09	1.48e-06	10.2453
PPIF	0.882096	8.2268	6.16026	5.66e-09	1.51e-06	10.2169
APOBEC3A /// APOBEC3A_B	1.29784	8.44522	6.111	7.27e-09	1.92e-06	9.97922
SULF2	1.15348	7.28472	6.10767	7.4e-09	1.93e-06	9.96319
LPAR5	-1.34711	7.12891	-6.10427	7.53e-09	1.94e-06	9.94685
HBEGF	1.23009	5.59406	6.08709	8.21e-09	2.1e-06	9.86428
GZMA	-0.80713	10.7174	-6.07605	8.68e-09	2.2e-06	9.81126
ID1	0.593547	4.48175	6.07062	8.92e-09	2.23e-06	9.78523
CD163	1.25271	6.78835	6.06219	9.31e-09	2.3e-06	9.74482
CH25H	0.843508	4.37109	6.04593	1.01e-08	2.48e-06	9.66704
VNN2	1.01556	9.31365	6.03796	1.05e-08	2.55e-06	9.62895
FAM49A	1.13859	7.25894	6.01883	1.16e-08	2.78e-06	9.5376
IL13RA1	0.97706	7.27026	6.00696	1.23e-08	2.92e-06	9.48104
PLAU	0.920961	5.5787	5.97358	1.45e-08	3.42e-06	9.32231
RAB32	0.963418	6.71865	5.94803	1.65e-08	3.85e-06	9.20123
SIRPA	0.598724	5.44819	5.94478	1.68e-08	3.87e-06	9.18583
ADIPOR1	0.665519	9.97831	5.94318	1.69e-08	3.87e-06	9.17827
FCGRT	0.669771	8.0853	5.93799	1.74e-08	3.93e-06	9.15372
LILRB1	0.618719	7.14114	5.93452	1.77e-08	3.96e-06	9.13731
ALDH2	1.19368	7.57597	5.92803	1.83e-08	4.05e-06	9.10667
ASGR1	0.619841	6.51519	5.91307	1.97e-08	4.33e-06	9.03604
HCK	0.957274	7.87804	5.88847	2.23e-08	4.77e-06	8.92015
TIMP2	0.78359	6.46569	5.88026	2.32e-08	4.91e-06	8.88157
LILRB2	0.890662	8.47229	5.85448	2.63e-08	5.53e-06	8.76057
DGAT2	0.859977	6.98634	5.84898	2.71e-08	5.61e-06	8.73481
RAB22A	-0.786795	8.96924	-5.84787	2.72e-08	5.61e-06	8.72959
GLUL	1.01763	8.10342	5.803	3.4e-08	6.94e-06	8.51997
ZNF137P	-0.874848	6.48865	-5.7889	3.64e-08	7.36e-06	8.45434
PDE7A	-0.908201	8.04745	-5.78765	3.66e-08	7.36e-06	8.44849
LOC153682	-0.986714	6.02214	-5.78483	3.71e-08	7.4e-06	8.4354
FCGR1B	1.04218	6.91022	5.78071	3.79e-08	7.46e-06	8.41624
FPR2	1.23453	6.5793	5.77991	3.81e-08	7.46e-06	8.41251
GADD45A	0.789918	8.93434	5.7773	3.85e-08	7.49e-06	8.4004
FCGR1A /// FCGR1B /// FCGR1C	0.878724	7.33126	5.74684	4.48e-08	8.53e-06	8.25905
FOLR3	1.23426	6.38882	5.74581	4.5e-08	8.53e-06	8.25432
BCL10	1.25916	6.87057	5.74286	4.56e-08	8.58e-06	8.24064
TBXAS1	0.657432	7.34928	5.73847	4.66e-08	8.7e-06	8.22035
BACH1	0.962022	8.92062	5.7349	4.75e-08	8.78e-06	8.20381
RP11-214K3.19	-0.737226	7.17477	-5.73237	4.8e-08	8.82e-06	8.19213
CD33	0.929494	6.04063	5.73044	4.85e-08	8.84e-06	8.1832
TULP2	0.937621	5.48419	5.72444	4.99e-08	9.03e-06	8.15546
RAD54B	-0.836246	6.02243	-5.7185	5.14e-08	9.23e-06	8.12806
TKT	0.701648	9.09561	5.71373	5.26e-08	9.36e-06	8.10602
LIN7A	0.857334	5.98863	5.71258	5.29e-08	9.36e-06	8.10072
MIR22 /// MIR22HG	0.958645	7.98713	5.70408	5.52e-08	9.68e-06	8.06153
GIMAP6	-1.03445	9.55488	-5.6975	5.7e-08	9.92e-06	8.03121
CSF2RA	0.61596	5.51317	5.69236	5.84e-08	1.01e-05	8.00756
TMEM176B	1.11895	6.09252	5.66875	6.55e-08	1.12e-05	7.89902
CLEC7A	1.25541	8.31848	5.66502	6.67e-08	1.14e-05	7.88189
EMR2	1.20228	6.71495	5.65021	7.17e-08	1.21e-05	7.81402
ATP6V0C	0.704473	8.31948	5.63118	7.86e-08	1.32e-05	7.72695
RNASE1	0.909475	6.13565	5.62599	8.06e-08	1.34e-05	7.70323
IKZF5	0.818684	7.63112	5.6229	8.18e-08	1.35e-05	7.6891
SPI1	0.725915	6.72536	5.62092	8.26e-08	1.35e-05	7.68006
MAFB	1.44113	8.99256	5.62027	8.29e-08	1.35e-05	7.67712
LOC100128751	-0.670802	7.16686	-5.59147	9.52e-08	1.53e-05	7.54586
GADD45B	1.03404	8.56134	5.58972	9.6e-08	1.54e-05	7.53789
FFAR2	0.927132	6.63245	5.57942	1.01e-07	1.6e-05	7.49108
DENND2D	-0.938547	9.26703	-5.56148	1.1e-07	1.74e-05	7.4097
NLRP3	1.10069	7.54211	5.55764	1.12e-07	1.76e-05	7.39229
CXCR1	0.7338	7.26385	5.55356	1.14e-07	1.78e-05	7.3738
LOC283357	-1.07585	7.73341	-5.54827	1.17e-07	1.81e-05	7.34987
JDP2	0.612339	6.37969	5.54741	1.18e-07	1.81e-05	7.34599
GVINP1	-1.01048	7.22808	-5.5432	1.2e-07	1.83e-05	7.32693
LINC00528	0.865397	7.28556	5.53486	1.25e-07	1.9e-05	7.28924
MXD1	0.737348	6.62379	5.52858	1.29e-07	1.94e-05	7.26085
MAFF	0.763257	7.17487	5.52702	1.3e-07	1.94e-05	7.25382
DAPK2	0.663523	6.6657	5.52225	1.33e-07	1.97e-05	7.23228
GCA	1.04118	9.18544	5.51132	1.4e-07	2.07e-05	7.183
JUN	0.823652	9.10304	5.50728	1.43e-07	2.09e-05	7.16482
SLC15A3	0.811606	6.45203	5.4991	1.48e-07	2.16e-05	7.12799
SIGLEC5	0.936453	6.50318	5.49675	1.5e-07	2.18e-05	7.11743
VNN1	1.10606	5.51482	5.48727	1.57e-07	2.26e-05	7.07479
CXCL2	0.893082	4.16815	5.47508	1.66e-07	2.36e-05	7.02009
RELT	0.727232	6.93552	5.47409	1.67e-07	2.36e-05	7.01567
SLC2A3	0.915335	9.68463	5.47219	1.68e-07	2.37e-05	7.00712
GPR84	0.700682	4.44306	5.46475	1.75e-07	2.43e-05	6.97377
HK3	0.657777	6.68426	5.46453	1.75e-07	2.43e-05	6.9728
CCR5	-0.910783	8.16226	-5.46352	1.76e-07	2.43e-05	6.96828
ACKR3 /// AK023507	-0.791645	5.72223	-5.45751	1.81e-07	2.48e-05	6.94135
FPR1	0.961529	5.8419	5.45417	1.84e-07	2.51e-05	6.92641
SLC7A7	1.04526	8.18288	5.44518	1.92e-07	2.6e-05	6.88624
PHACTR1	1.17106	6.038	5.44361	1.93e-07	2.61e-05	6.87922
ELOVL4	-0.886119	6.42147	-5.43921	1.97e-07	2.65e-05	6.85956
HMG20A	-0.810365	7.9153	-5.43653	2e-07	2.67e-05	6.8476
LILRA2	1.22005	7.38258	5.4337	2.02e-07	2.69e-05	6.83496
CCRL2	0.958389	6.15592	5.42273	2.13e-07	2.81e-05	6.78605
TMEM204	-0.780896	7.87049	-5.41926	2.17e-07	2.84e-05	6.77057
CD300LF	1.10949	6.87975	5.41511	2.21e-07	2.88e-05	6.75208
FCER1G	1.4687	8.10178	5.40369	2.33e-07	3.03e-05	6.7013
PTX3	1.52424	6.09417	5.38911	2.5e-07	3.22e-05	6.63652
IGIP	-0.763811	7.70616	-5.3883	2.51e-07	3.22e-05	6.63294
ZFP3	-0.854269	5.72428	-5.37711	2.64e-07	3.37e-05	6.58333
RAB20	0.834971	6.36222	5.35258	2.96e-07	3.75e-05	6.47478
P2RY13	1.1791	6.47315	5.3499	3e-07	3.77e-05	6.46296
CPVL	1.13259	7.10166	5.33934	3.15e-07	3.94e-05	6.41637
EFEMP1	1.11616	4.14002	5.33533	3.21e-07	4e-05	6.3987
CDKN1A	0.915139	7.83235	5.33022	3.29e-07	4.07e-05	6.37616
IER3	1.05897	9.89156	5.32862	3.31e-07	4.08e-05	6.36914
MIR6732 /// ZC3H12A	0.675207	5.96708	5.32018	3.45e-07	4.22e-05	6.33198
PILRA	0.896393	7.07215	5.31911	3.47e-07	4.22e-05	6.32726
CST3	0.858438	7.46119	5.31666	3.51e-07	4.25e-05	6.31648
CCNJL	0.623873	6.9905	5.30871	3.64e-07	4.39e-05	6.28155
LILRB3	0.775477	8.46676	5.30513	3.7e-07	4.44e-05	6.26585
LINC01000 /// LINC01001 /// LINC01002 /// LOC100132062 /// LOC100133182 /// LOC100133331 /// LOC101929819 /// LOC729737	0.717974	8.83704	5.29116	3.95e-07	4.71e-05	6.20459
WDFY3	0.8435	5.55718	5.26845	4.39e-07	5.21e-05	6.10522
SLPI	0.990981	6.61111	5.26639	4.43e-07	5.23e-05	6.09622
RP11-473I1.9	0.745402	8.88364	5.25547	4.66e-07	5.48e-05	6.04853
C15orf48	1.10339	6.2762	5.24441	4.9e-07	5.71e-05	6.00033
ANKEF1	-0.87379	6.01962	-5.24317	4.93e-07	5.71e-05	5.99494
TMEM176A	0.872705	6.32264	5.24044	4.99e-07	5.76e-05	5.98308
FCGR3B	1.07331	10.1682	5.23759	5.06e-07	5.8e-05	5.97065
NR4A2	1.19111	7.04366	5.2225	5.43e-07	6.12e-05	5.90507
B3GALT2	-1.02602	5.36974	-5.2159	5.59e-07	6.26e-05	5.87644
CD83	1.09922	8.44866	5.21453	5.63e-07	6.27e-05	5.87047
ETS2	0.893878	7.90267	5.21041	5.74e-07	6.36e-05	5.85259
GNA13	0.941235	6.00234	5.20054	6e-07	6.63e-05	5.80983
CEBPB	0.99691	10.0419	5.19149	6.26e-07	6.88e-05	5.77068
ARHGEF40	0.643742	6.275	5.18788	6.36e-07	6.96e-05	5.7551
RBM38	0.613722	9.36715	5.18574	6.43e-07	6.97e-05	5.74581
TRIM61	-0.589462	5.51442	-5.1855	6.43e-07	6.97e-05	5.74479
RP11-53O19.3	-0.791122	7.19135	-5.18456	6.46e-07	6.97e-05	5.74073
PTCH1	-0.830787	4.46483	-5.17997	6.6e-07	7.07e-05	5.72092
SBK1	-0.680706	7.23774	-5.17932	6.62e-07	7.07e-05	5.71808
PRDM1	0.658345	7.23221	5.17652	6.7e-07	7.13e-05	5.70601
THNSL1	-0.740237	3.81107	-5.1739	6.78e-07	7.19e-05	5.69472
BTG1	0.8328	8.20744	5.16479	7.07e-07	7.42e-05	5.65543
HLTF	-0.593438	8.67113	-5.16284	7.14e-07	7.46e-05	5.64702
TLR8	0.983765	5.5851	5.15393	7.43e-07	7.7e-05	5.60869
NRIP1	-0.78658	8.34799	-5.15023	7.56e-07	7.8e-05	5.59276
SNORD89	0.821983	7.56251	5.13609	8.07e-07	8.21e-05	5.53201
GATAD1	-0.655807	6.77534	-5.132	8.22e-07	8.33e-05	5.51446
NHLRC2	-0.681866	7.92489	-5.12007	8.68e-07	8.76e-05	5.46336
NIF3L1	-0.65915	8.14976	-5.11561	8.86e-07	8.9e-05	5.44423
PTGDR	-0.787128	6.92666	-5.11156	9.02e-07	9.02e-05	5.4269
FURIN	0.721724	8.24865	5.10327	9.37e-07	9.33e-05	5.39147
PGBD2	-0.593285	6.61498	-5.10179	9.43e-07	9.35e-05	5.38518
APOBEC3G	-0.616758	10.4312	-5.09079	9.91e-07	9.75e-05	5.33819
HSPA6	0.616033	7.3894	5.08393	1.02e-06	0.000100171	5.30899
CSF2RB	0.953128	9.60888	5.07671	1.06e-06	0.000103076	5.27821
CLIC5	-0.858275	6.17869	-5.07317	1.07e-06	0.000104309	5.26314
LYZ	1.37947	8.82762	5.05147	1.18e-06	0.000114117	5.17097
PDE4B	0.635889	9.60159	5.04743	1.21e-06	0.000115742	5.15384
TP53INP2	1.06057	7.28978	5.04645	1.21e-06	0.000115779	5.14971
ADRB2	-0.682377	8.64248	-5.04206	1.24e-06	0.000117616	5.13111
ZNF623	-0.745847	5.99139	-5.03337	1.29e-06	0.000121823	5.0943
CTD-3025N20.3	-0.827656	4.15018	-5.03215	1.29e-06	0.000121999	5.08917
RNF103	0.833221	7.67154	5.03	1.3e-06	0.000122696	5.08005
PRKCD	0.66081	6.83847	5.02648	1.33e-06	0.000124155	5.0652
RP11-119F7.5	-0.675775	4.88209	-5.02434	1.34e-06	0.000124862	5.05613
THAP2	-0.767894	4.63258	-5.02289	1.35e-06	0.00012518	5.05002
MIR6883 /// PER1	0.906543	7.39188	5.0165	1.39e-06	0.000128321	5.02304
FOSB	0.904357	7.13257	5.01157	1.42e-06	0.000130681	5.00223
SLC7A5	0.758507	8.31173	5.00747	1.44e-06	0.000132591	4.98493
RBM12B	-0.75558	6.0104	-4.99757	1.51e-06	0.000138072	4.94324
NUP43	-0.800202	7.90173	-4.99268	1.54e-06	0.000140579	4.9227
SLC25A37	0.718338	9.69893	4.98653	1.59e-06	0.000143947	4.89684
KCNJ2	1.14408	8.57554	4.98399	1.6e-06	0.000145032	4.88617
LBH	-0.695561	9.99457	-4.97829	1.65e-06	0.000147218	4.86223
LMO2	0.689069	7.43488	4.97808	1.65e-06	0.000147218	4.86135
RARA-AS1	0.589356	5.65353	4.97416	1.68e-06	0.000149254	4.8449
PARP11	-0.666889	6.92409	-4.97197	1.69e-06	0.000150152	4.83572
MPP1	0.889019	8.25832	4.96475	1.75e-06	0.00015391	4.80545
HP /// HPR	0.613796	6.15516	4.9588	1.79e-06	0.000157459	4.78055
TARP /// TRGC2 /// TRGV9	-0.79847	9.1709	-4.95212	1.85e-06	0.00016102	4.75258
CLEC4A	0.970204	7.6485	4.93292	2.01e-06	0.000174729	4.67244
TRIM68	-0.595102	8.18645	-4.92887	2.05e-06	0.00017725	4.65555
CRTAM	-0.942192	6.77219	-4.92412	2.09e-06	0.00018025	4.63579
TRG-AS1	-0.829324	9.16156	-4.92344	2.1e-06	0.00018025	4.63293
RILPL2	0.762776	8.83391	4.91806	2.15e-06	0.000183444	4.61054
EOMES	-0.879422	8.88221	-4.91784	2.15e-06	0.000183444	4.60963
GIMAP4	-0.964624	9.79531	-4.90246	2.31e-06	0.000194963	4.54574
TNFAIP6	1.02733	6.67579	4.88859	2.45e-06	0.000205815	4.48822
HOXB-AS1	-0.836828	6.45119	-4.88647	2.47e-06	0.000207011	4.47944
RP11-732A19.1	-0.769825	6.16415	-4.87274	2.63e-06	0.000217611	4.42266
FCGR1A	0.683402	3.54939	4.8694	2.67e-06	0.000220064	4.40886
GTF2E1	-0.673719	8.04428	-4.86372	2.74e-06	0.000224071	4.38539
NOG	-0.882958	6.71901	-4.86088	2.77e-06	0.000226097	4.37369
CTD-2541M15.1	-0.736164	7.17556	-4.85902	2.79e-06	0.000227166	4.36602
TNFSF13	0.723621	7.24849	4.85625	2.83e-06	0.00022916	4.35459
GCSAM	-0.640486	5.49919	-4.85534	2.84e-06	0.000229285	4.35085
SAT1	0.688196	11.3706	4.85325	2.86e-06	0.000230612	4.34222
ZNF786	-0.699307	6.81815	-4.85069	2.9e-06	0.000232419	4.3317
SAMSN1	0.958651	8.18413	4.84875	2.92e-06	0.000233618	4.32369
CFP	0.91809	7.43327	4.8471	2.94e-06	0.000234518	4.3169
LINC01000	0.680806	8.6062	4.84077	3.03e-06	0.000240307	4.29088
G0S2	0.843971	10.1394	4.83226	3.14e-06	0.000247773	4.2559
CXCL1	1.15214	7.97713	4.81626	3.37e-06	0.000264865	4.19026
ZNF785	-0.633489	5.50083	-4.80585	3.53e-06	0.000275445	4.14765
RIT1	0.786654	7.32235	4.80501	3.54e-06	0.000275445	4.14421
TM6SF1	0.969314	6.49524	4.80002	3.62e-06	0.000280179	4.12382
A2M-AS1	-0.920312	8.06893	-4.79959	3.62e-06	0.000280179	4.12207
MBOAT7	0.751347	7.53608	4.79775	3.65e-06	0.000281512	4.11454
FGR	1.15444	8.93107	4.78855	3.8e-06	0.000292076	4.07698
IRS2	0.79331	9.38226	4.78638	3.84e-06	0.00029388	4.06816
HTRA1	0.721233	5.56443	4.78006	3.94e-06	0.00030012	4.0424
AGAP1	-0.784848	5.26497	-4.76944	4.13e-06	0.000310143	3.99917
COG6	-0.709885	7.95276	-4.76513	4.21e-06	0.000314148	3.98162
ELP2	-0.643853	6.80934	-4.76411	4.23e-06	0.000314544	3.97747
HCG8 /// ZNRD1-AS1	-0.699669	5.62388	-4.75746	4.35e-06	0.000322726	3.95047
SMARCAD1	-0.788848	7.31923	-4.75568	4.39e-06	0.000323193	3.94323
AC079305.10	0.957758	5.34874	4.74947	4.5e-06	0.000330965	3.91806
AOAH	0.628604	8.16489	4.74554	4.58e-06	0.000333883	3.90212
CLEC12A	1.04349	7.48086	4.74529	4.59e-06	0.000333883	3.90111
RAE1	0.659514	9.2304	4.72659	4.97e-06	0.000357562	3.82547
GPR97	0.670033	5.61711	4.72431	5.02e-06	0.000359579	3.81626
AMIGO2	-0.883188	7.43514	-4.72388	5.03e-06	0.000359579	3.8145
RNF175	0.840839	7.1441	4.71998	5.12e-06	0.000364568	3.79877
C10orf54	0.6422	8.60287	4.71065	5.33e-06	0.000378387	3.76113
GBP3	-0.787012	8.61404	-4.70989	5.34e-06	0.00037848	3.75808
ZNF224	-0.653907	6.664	-4.70833	5.38e-06	0.000379389	3.7518
EMC10	-0.629352	6.45083	-4.70794	5.39e-06	0.000379389	3.75022
TYROBP	0.996492	9.77958	4.70275	5.51e-06	0.000386803	3.72932
MAP3K8	0.897211	6.83639	4.69247	5.76e-06	0.000401877	3.68799
LAX1	-0.627187	7.51123	-4.691	5.8e-06	0.000403222	3.68209
STK17B	0.905632	9.47393	4.6901	5.82e-06	0.000403586	3.67849
LINC01355	-0.747899	5.71241	-4.68714	5.89e-06	0.000407558	3.66658
KCTD12	0.904721	8.65331	4.68614	5.92e-06	0.000408109	3.66256
FAM153A /// FAM153B /// FAM153C /// LOC100507387 /// LOC101928349 /// LOC101930363	-0.595601	7.98407	-4.68467	5.96e-06	0.00040949	3.65667
CYSTM1	0.794473	8.10638	4.68057	6.06e-06	0.000415537	3.64023
AX747507	-0.806711	5.0843	-4.67779	6.13e-06	0.000419302	3.62907
GIMAP8	-0.996132	8.42185	-4.66742	6.41e-06	0.00043565	3.58753
RP11-96D1.11	-0.595607	5.93474	-4.66683	6.43e-06	0.00043565	3.58519
NINJ1	0.647815	7.68491	4.66276	6.54e-06	0.000440762	3.56891
TCEB3-AS1	-0.676868	6.55475	-4.66106	6.59e-06	0.000442707	3.56212
NAPEPLD	-0.890328	5.5093	-4.66	6.62e-06	0.000443465	3.55785
ZNF420	-0.706023	5.81743	-4.65825	6.67e-06	0.000445512	3.55089
THEMIS2	0.641788	8.77109	4.64933	6.93e-06	0.000461508	3.51526
NCF2	0.884846	9.31292	4.64069	7.19e-06	0.000477495	3.48079
FUT11	-0.671498	7.56391	-4.63605	7.33e-06	0.000485651	3.46233
ZNF544	-0.621094	7.73127	-4.63178	7.47e-06	0.000493176	3.44533
EPAS1	0.965832	6.02608	4.62652	7.64e-06	0.000501538	3.42439
EMILIN2	0.593549	5.4309	4.62287	7.76e-06	0.000507963	3.40989
DHFRL1	-0.637119	5.32384	-4.61969	7.86e-06	0.000512027	3.39725
MARCKS	0.632512	6.38866	4.61873	7.89e-06	0.000512683	3.39347
SLC6A16	-0.749747	7.5601	-4.61264	8.1e-06	0.000523226	3.36931
LPCAT2	0.917828	4.95311	4.60951	8.21e-06	0.000527784	3.35687
TSPAN16	0.729394	7.40813	4.60931	8.22e-06	0.000527784	3.35608
LUC7L	-0.605437	7.48341	-4.60045	8.53e-06	0.00054353	3.321
SSH2	0.819142	7.0279	4.59744	8.64e-06	0.000548603	3.30909
COX11	-0.726438	7.05425	-4.59699	8.66e-06	0.000548603	3.30727
SACS	-0.591956	9.1714	-4.58978	8.92e-06	0.000563452	3.2788
HERC4	-0.825256	5.72252	-4.58941	8.94e-06	0.000563452	3.27731
LOC100289090 /// RP11-23P13.6	-0.69961	7.06288	-4.57709	9.42e-06	0.000590407	3.22868
FBXL4	-0.624009	7.1633	-4.56975	9.71e-06	0.000607367	3.19976
WDR36	-0.589288	7.73725	-4.56521	9.9e-06	0.000617449	3.18191
RP11-140I16.3	-0.837798	5.59815	-4.56253	1e-05	0.000622813	3.17136
LILRA3	0.634326	6.97651	4.55721	1.02e-05	0.000633587	3.15042
ARG1	0.925119	6.1333	4.55475	1.03e-05	0.000638501	3.14076
MARC1	0.690704	6.49493	4.553	1.04e-05	0.000641524	3.13391
TNFSF12-TNFSF13 /// TNFSF13	0.683654	5.96142	4.54286	1.09e-05	0.000667716	3.09412
RP11-158G18.1	-0.708338	8.71307	-4.54127	1.1e-05	0.000668907	3.08787
SH3TC1	0.699841	6.06844	4.54033	1.1e-05	0.000668907	3.08417
CLEC4E	0.659712	5.4224	4.54002	1.1e-05	0.000668907	3.08295
ZNF24	0.62744	6.50575	4.53892	1.11e-05	0.000668907	3.07867
NCF4	0.667726	8.80007	4.53874	1.11e-05	0.000668907	3.07795
ZNF780A	-0.708231	4.61023	-4.53737	1.11e-05	0.00067103	3.0726
AX748417 /// CAMK1	-0.730713	6.72712	-4.53565	1.12e-05	0.000674182	3.06584
LGALS2	0.765598	6.93341	4.53158	1.14e-05	0.00068229	3.04992
SMKR1	-0.640566	5.09885	-4.52747	1.16e-05	0.000692379	3.03386
CLEC1A	0.765257	4.08311	4.51946	1.2e-05	0.000714207	3.00254
ATP6V0B	0.638032	9.24954	4.51846	1.2e-05	0.000715396	2.99863
CRYGS	-0.641776	5.22431	-4.51544	1.22e-05	0.000722648	2.98687
TPBG	-0.693435	6.49946	-4.5137	1.23e-05	0.000725298	2.98006
LST1	0.597389	9.18328	4.51277	1.23e-05	0.000725298	2.97643
COTL1	0.745231	7.81448	4.50607	1.27e-05	0.00074402	2.95033
C9orf85	-0.61053	5.50316	-4.50302	1.29e-05	0.000749838	2.93843
AX746755 /// RP11-774O3.3	-0.779205	6.2862	-4.50165	1.29e-05	0.000750425	2.93308
FANCF	-0.817094	7.64536	-4.4981	1.31e-05	0.000759739	2.91928
PRKCQ-AS1	-0.596658	7.24434	-4.49261	1.34e-05	0.000775422	2.89793
SLC22A4	0.935241	6.20876	4.47852	1.42e-05	0.000812302	2.84323
CEBPD	0.604392	8.60083	4.47637	1.44e-05	0.000816406	2.83488
PMAIP1	0.8525	9.07248	4.47615	1.44e-05	0.000816406	2.83401
AK026714 /// PELI1	0.717888	9.81808	4.46969	1.48e-05	0.000834579	2.809
LOC645984	0.835543	5.11874	4.4681	1.49e-05	0.000838104	2.80284
SLC11A1	0.653829	4.84396	4.46321	1.52e-05	0.000852538	2.78392
NPL	0.839387	7.00009	4.45747	1.55e-05	0.000867559	2.76175
KRT23	0.67156	6.53831	4.45526	1.57e-05	0.000873471	2.75321
CYP4F3	0.821658	7.22204	4.45129	1.59e-05	0.000883132	2.73786
SEMA4A	0.595262	7.07479	4.45033	1.6e-05	0.000883132	2.73417
CD93	0.651125	7.22411	4.44634	1.63e-05	0.000895724	2.71879
LINC00526	-0.586203	6.06198	-4.44414	1.64e-05	0.000901808	2.7103
PI3	0.711086	7.35204	4.43457	1.71e-05	0.000933848	2.67344
CCL3 /// CCL3L1 /// CCL3L3	1.20552	8.25859	4.42085	1.81e-05	0.000982487	2.62068
OSER1	0.67526	8.80635	4.42058	1.81e-05	0.000982487	2.61967
RPH3A	0.654102	5.04128	4.41992	1.81e-05	0.000982906	2.61712
CTC-510F12.4	0.811847	7.33002	4.40851	1.9e-05	0.00102078	2.57337
CYBB	0.687786	7.34627	4.40306	1.94e-05	0.00104157	2.55248
GBP4	-0.653783	7.98321	-4.40247	1.95e-05	0.0010417	2.55024
RGS1	0.858416	7.51349	4.39635	2e-05	0.0010634	2.52683
RAB8B	0.586558	8.18772	4.3928	2.03e-05	0.00107658	2.51326
ZNF302	-0.689786	7.81485	-4.39051	2.05e-05	0.00108324	2.50453
ZNF260	-0.780635	7.6471	-4.38894	2.06e-05	0.00108639	2.49853
NKG7	-0.752096	9.78392	-4.38774	2.07e-05	0.00108688	2.49394
ACPP	0.651269	5.1377	4.38338	2.11e-05	0.00110401	2.47732
C4orf29	-0.730315	7.06885	-4.37136	2.21e-05	0.00115148	2.43152
RTP4	-0.617751	6.48888	-4.36634	2.26e-05	0.00117072	2.41241
TMEM68	-0.691196	6.11342	-4.36267	2.29e-05	0.00118492	2.39847
TAGAP	0.693821	7.90067	4.36051	2.32e-05	0.00119108	2.39024
ARMC1	-0.729354	8.21821	-4.35906	2.33e-05	0.00119551	2.38476
ARRB2	0.608709	8.46488	4.35508	2.37e-05	0.00120982	2.36963
ZFAND4	-0.633515	6.28948	-4.35294	2.39e-05	0.00121775	2.36154
GIN1	-0.747021	5.8017	-4.34698	2.45e-05	0.00123966	2.33892
ASF1A	-0.782031	8.56384	-4.34556	2.46e-05	0.00124413	2.33356
ZNF320	-0.729685	4.75118	-4.34413	2.48e-05	0.00124647	2.32812
AK126278 /// CUL4A	-0.685608	6.69052	-4.34405	2.48e-05	0.00124647	2.32783
LILRA5	0.64023	5.88025	4.32968	2.62e-05	0.0013103	2.27345
LIG3	-0.594591	9.05251	-4.32848	2.64e-05	0.0013139	2.26893
LOC101928290 /// LOC101928317	0.604338	5.16156	4.32476	2.68e-05	0.00133106	2.2549
PLEK	0.695101	8.54861	4.32237	2.7e-05	0.0013384	2.24586
PFKFB3	0.831696	10.2464	4.30421	2.91e-05	0.00143155	2.17747
GABARAPL1 /// GABARAPL3	0.74714	9.67743	4.30203	2.94e-05	0.00143822	2.16927
PURA	-0.66401	9.39253	-4.28626	3.13e-05	0.00150768	2.11008
SLAIN2	-0.677176	6.03389	-4.28188	3.19e-05	0.00153137	2.09369
TNF	0.7526	7.14919	4.28085	3.2e-05	0.00153464	2.08982
METTL21B	-0.681546	6.1454	-4.27916	3.22e-05	0.00154192	2.08352
SULT1B1	0.653382	5.9811	4.27389	3.29e-05	0.00156865	2.06378
C2orf44	-0.602138	6.85666	-4.27266	3.31e-05	0.0015732	2.05921
SLC24A4	0.801061	6.45164	4.26875	3.36e-05	0.00159497	2.04457
PRKACB	-0.739894	10.4299	-4.26014	3.48e-05	0.00163304	2.01246
KLHL42	-0.620959	8.19135	-4.2595	3.49e-05	0.00163304	2.01007
RNF19B	0.749837	7.91174	4.25895	3.49e-05	0.00163304	2.008
ELL2	0.646514	5.55525	4.25889	3.49e-05	0.00163304	2.00777
RP11-443B7.1	0.612287	5.24461	4.24622	3.68e-05	0.00170246	1.96058
TRMT13	-0.778574	8.20689	-4.24604	3.68e-05	0.00170246	1.95993
FAM171A1	-0.67464	7.44394	-4.23633	3.82e-05	0.00175616	1.92383
LOC102724356	-0.594326	7.98834	-4.23238	3.89e-05	0.00177972	1.90917
NNT-AS1	-0.661741	6.76638	-4.23202	3.89e-05	0.00177972	1.90784
SHQ1	-0.648923	8.73445	-4.22726	3.97e-05	0.00180333	1.8902
OSCAR	0.613111	5.62261	4.22285	4.04e-05	0.00183189	1.87383
MME	0.929195	6.29836	4.2205	4.07e-05	0.0018403	1.86515
GJA1	0.942209	5.92833	4.21639	4.14e-05	0.0018546	1.84994
RP11-747H7.3	-0.6783	8.07561	-4.2155	4.16e-05	0.00185532	1.84665
LINC00959	-0.671257	6.40407	-4.21534	4.16e-05	0.00185532	1.84605
ZNF385A	0.634982	5.67285	4.20777	4.29e-05	0.00190849	1.81808
RBM6	-0.642717	8.965	-4.20291	4.37e-05	0.00193385	1.80014
ENOSF1	-0.63583	8.38578	-4.19206	4.56e-05	0.00200876	1.76014
SYTL2	-0.63817	5.76336	-4.19205	4.56e-05	0.00200876	1.76011
GZF1	0.633557	7.32167	4.19089	4.58e-05	0.00201425	1.75584
RP11-226L15.5	-0.65226	5.86635	-4.17944	4.8e-05	0.00208446	1.71373
MGC27345 /// RBM28	-0.627131	7.49014	-4.17877	4.81e-05	0.00208618	1.71125
UBR1	-0.645915	9.32293	-4.17707	4.84e-05	0.0020964	1.70502
MNDA	0.87186	9.74588	4.16798	5.02e-05	0.00215727	1.67168
PTP4A1	0.657331	7.6821	4.16177	5.14e-05	0.00220284	1.64892
TTC39B	-0.675342	7.54213	-4.14531	5.49e-05	0.00233782	1.58876
SERPINB8	0.64738	4.72619	4.14071	5.59e-05	0.00237194	1.57198
PRPSAP2	-0.62124	8.43425	-4.1368	5.68e-05	0.00240011	1.55771
CD302 /// LY75 /// LY75-CD302	0.731969	9.31289	4.13352	5.75e-05	0.00242686	1.54578
LOC100131541	-0.723427	8.07741	-4.12866	5.86e-05	0.0024648	1.52809
ARRDC4	0.81523	6.48438	4.124	5.97e-05	0.00250584	1.51114
ZHX2	-0.663941	6.77396	-4.11931	6.08e-05	0.00252899	1.4941
AMPD2	0.622529	9.05718	4.10983	6.31e-05	0.00259339	1.4597
ST3GAL5	-0.623337	8.93048	-4.10726	6.37e-05	0.00261498	1.45041
MANSC1	0.784011	7.65488	4.10369	6.46e-05	0.0026472	1.43746
ZNF382	-0.748721	6.03957	-4.09198	6.77e-05	0.00274719	1.39512
ITGAM	0.746126	9.09315	4.08664	6.91e-05	0.0028001	1.37587
CPPED1	0.656399	8.05622	4.08374	6.99e-05	0.00281617	1.36539
LYN	0.68932	10.0223	4.08297	7.01e-05	0.00281617	1.36263
ZCCHC14	-0.609699	7.15246	-4.0825	7.02e-05	0.00281652	1.36093
CAMTA1	-0.826036	7.4495	-4.07096	7.34e-05	0.00290284	1.31937
OR52K3P	0.74298	4.76481	4.07043	7.36e-05	0.00290284	1.31748
IGFBP7	0.588813	6.81931	4.06858	7.41e-05	0.00291363	1.31082
FCGR2A /// FCGR2C	0.603312	5.78928	4.06781	7.43e-05	0.00291754	1.30803
ZKSCAN7	-0.844646	6.47195	-4.06683	7.46e-05	0.00292371	1.30454
SUZ12P /// SUZ12P1	-0.656096	4.41923	-4.06313	7.57e-05	0.00295857	1.29123
SPON1	-0.655737	6.02056	-4.0557	7.79e-05	0.00302762	1.26456
BET1	-0.745975	7.68235	-4.05527	7.8e-05	0.00302766	1.26302
RGS2	0.773815	11.2575	4.05366	7.85e-05	0.00304157	1.25726
ZNF792	-0.802775	5.47842	-4.05113	7.93e-05	0.00306144	1.2482
LINC01410	0.615744	6.3233	4.04856	8.01e-05	0.00308201	1.23897
BASP1	0.831632	10.8894	4.04756	8.04e-05	0.00308894	1.23538
MRPL50	-0.599463	6.88421	-4.04482	8.13e-05	0.00311166	1.22559
SCARNA17	-0.67264	9.12867	-4.0437	8.16e-05	0.00311501	1.22159
SERPINB2	0.88271	4.7277	4.03835	8.33e-05	0.003175	1.20246
RP6-99M1.2	0.800125	5.70959	4.03705	8.37e-05	0.00318129	1.19781
LEO1	-0.653902	6.75689	-4.03675	8.38e-05	0.00318129	1.19674
ABCB1	-0.67231	6.82991	-4.03294	8.51e-05	0.00321728	1.18313
CHP1	0.58841	6.5456	4.02591	8.74e-05	0.00328517	1.15806
KLHL6	-0.680149	6.1639	-4.02577	8.75e-05	0.00328517	1.15755
CCL14 /// CCL15-CCL14	0.666387	5.24698	4.02247	8.86e-05	0.00332191	1.14579
FCGR2A	0.642792	4.15418	4.01645	9.07e-05	0.00338368	1.12436
STAG3L2 /// STAG3L3 /// TRIM73	-0.692883	7.83888	-4.01498	9.12e-05	0.00339213	1.11913
AF131215.4	-0.664019	5.10006	-4.00846	9.35e-05	0.00346188	1.09595
INPP4A	-0.609348	8.71416	-4.00672	9.41e-05	0.00347855	1.0898
TCRDV2 /// TRDC /// TRDC /// YME1L1	-0.740756	8.5404	-4.00413	9.51e-05	0.00350331	1.0806
RBM47	0.717108	7.92719	4.00337	9.53e-05	0.00350816	1.07788
HIST2H2AA3 /// HIST2H2AA4	0.636619	9.42595	3.99787	9.74e-05	0.00356629	1.05837
FOS	0.886573	9.14497	3.99668	9.78e-05	0.00357142	1.05417
PLA2G7	0.739446	4.9393	3.9822	0.00010341	0.00374619	1.00292
CCRN4L	0.76142	6.68681	3.97593	0.000105917	0.0038311	0.980806
KIAA1598	0.656194	6.91009	3.97378	0.000106793	0.00385095	0.973201
ST3GAL6	0.813076	5.62021	3.97273	0.00010722	0.0038545	0.969523
CREB5	0.718795	7.54945	3.96382	0.00011093	0.00395763	0.938124
NLRC3	-0.732608	9.33173	-3.95725	0.000113743	0.00402136	0.915021
NUB1	-0.601183	7.62315	-3.9528	0.000115687	0.00407784	0.899381
PRSS35	-0.73153	4.44545	-3.95151	0.000116259	0.00408796	0.894835
TRAC /// TRAV23DV6 /// TRAV23DV6	-0.750723	5.39199	-3.95137	0.000116322	0.00408796	0.894333
REM2	0.740611	7.35505	3.9504	0.000116751	0.00409692	0.890934
IFI30 /// PIK3R2	0.674154	9.76749	3.9351	0.000123738	0.00429085	0.837327
HIVEP1	0.698193	5.41596	3.93321	0.000124628	0.00431537	0.830713
RAB31	0.66627	8.70627	3.92773	0.000127243	0.00438011	0.811566
ARHGAP26	0.65819	9.06034	3.92383	0.000129138	0.00442413	0.797935
SLAMF7	-0.777252	6.48998	-3.92355	0.000129275	0.00442413	0.796963
EGR1	0.905535	5.82017	3.91245	0.000134819	0.00459382	0.758251
ZMYM6 /// ZMYM6NB	-0.669812	8.1524	-3.90741	0.00013741	0.00466183	0.740708
SLC8A1-AS1	0.723869	4.61204	3.90418	0.000139095	0.00469943	0.729477
SOD2	0.616896	10.9529	3.90372	0.000139338	0.0047001	0.727869
FEZ1	-0.629036	5.26015	-3.89276	0.000145212	0.00486416	0.689825
UHRF1BP1L	0.71868	5.79687	3.88618	0.000148851	0.00494997	0.667024
CHI3L1	1.08771	6.41334	3.88068	0.000151962	0.005025	0.647971
C16orf52 /// LOC101930115 /// VWA3A	-0.722417	6.74271	-3.87284	0.000156497	0.00513882	0.620892
NSFL1C	0.615416	7.5063	3.86816	0.000159269	0.00522257	0.604723
PPM1K	-0.660983	9.82215	-3.864	0.00016177	0.00529719	0.590378
TSIX	-1.4182	6.11445	-3.85723	0.00016592	0.00541045	0.567065
ZBTB6	-0.59159	4.8104	-3.85257	0.000168836	0.00549032	0.551028
CHST15	0.790447	8.68372	3.85203	0.000169173	0.00549369	0.549192
IFNGR1	0.620623	10.676	3.84932	0.000170897	0.00552678	0.53986
TLR4	0.600845	6.29869	3.84869	0.000171296	0.00553207	0.537715
EGR2	0.610851	6.00117	3.84716	0.000172282	0.00555626	0.532435
SYAP1	0.600858	8.85233	3.84251	0.000175294	0.00563023	0.516489
KLRB1	-0.687106	11.4992	-3.83952	0.000177263	0.00568245	0.506209
ELOVL6	-0.650227	6.94969	-3.83658	0.000179212	0.00572047	0.49615
TMEM169	-0.585408	6.05701	-3.83657	0.000179222	0.00572047	0.496099
SLC35B3	-0.683561	8.49096	-3.83642	0.00017932	0.00572047	0.495596
ABCB1 /// ABCB4	-0.614472	7.09106	-3.83289	0.000181695	0.0057838	0.483493
CCDC65	-0.681315	7.06904	-3.82465	0.000187344	0.00592818	0.455332
LIN52	-0.602386	6.43461	-3.82009	0.000190549	0.00601341	0.439732
TNFAIP3	0.845949	9.23729	3.81358	0.000195206	0.00610306	0.417527
PCMT1	-0.605799	10.0967	-3.81192	0.000196415	0.0061327	0.411851
IGSF6	0.654591	8.32856	3.81023	0.000197649	0.00614472	0.406097
MFSD8	-0.745398	8.46147	-3.80996	0.000197846	0.00614472	0.40518
KIAA1143	-0.654261	9.30542	-3.80486	0.000201621	0.00624548	0.387803
GEMIN5	-0.678437	6.38754	-3.79778	0.000206972	0.00639438	0.363729
ZNRD1	-0.585456	7.33223	-3.78895	0.00021383	0.00658894	0.333774
COLQ	-0.627863	6.97245	-3.78785	0.000214702	0.00659851	0.330035
ORM1	0.630959	6.00045	3.78657	0.000215719	0.0066211	0.325694
CREM	0.603008	7.75113	3.78163	0.000219688	0.00669919	0.308946
CXCR2	0.681836	8.71856	3.77803	0.000222622	0.00676235	0.296759
HP	0.615727	6.7233	3.77745	0.000223091	0.00676787	0.294822
ASAH1	0.60985	8.20247	3.76379	0.000234588	0.00706288	0.248676
LRRK2	0.887667	9.01068	3.75686	0.000240636	0.00717058	0.225306
WLS	0.811403	6.45194	3.75627	0.000241152	0.00717688	0.223337
FNIP1	0.645925	6.59589	3.75032	0.000246478	0.00731684	0.203287
MEST	-0.664952	5.57735	-3.73697	0.000258815	0.00759676	0.158464
DSEL	-0.659694	4.28903	-3.73526	0.000260429	0.00761562	0.15276
DUSP7	-0.630442	8.00763	-3.73031	0.000265181	0.00771616	0.136174
EGR3	0.797459	7.42527	3.72344	0.000271914	0.00786343	0.113174
EREG	0.657285	6.47735	3.71775	0.000277609	0.0079986	0.094165
KLRC4-KLRK1 /// KLRK1	-0.608984	8.47582	-3.71322	0.000282224	0.00811171	0.0790441
ZNF277	-0.701246	4.98392	-3.71097	0.00028454	0.00816828	0.071552
AC005224.2	-0.644029	4.90803	-3.70204	0.000293916	0.00833567	0.0418297
CTB-167B5.2	0.731163	5.40635	3.70006	0.00029604	0.00834883	0.0352297
ENPP5	-0.635175	4.60354	-3.69806	0.000298192	0.00834883	0.0285917
CEACAM4	0.606018	5.10277	3.69656	0.000299823	0.00838186	0.0235921
TTC9C	-0.654921	4.95764	-3.69325	0.000303433	0.00846071	0.0126236
IL23R	-0.704098	4.84431	-3.67899	0.000319499	0.00882214	-0.0346453
MINPP1	-0.727931	5.63552	-3.67356	0.000325826	0.00892974	-0.0526074
MST4	-0.589961	9.62037	-3.67352	0.000325878	0.00892974	-0.0527536
RP11-350F4.2	-0.673836	6.30848	-3.67287	0.000326646	0.00894037	-0.0549096
HIST2H2BE	0.642782	9.1124	3.66901	0.000331225	0.00904463	-0.0676582
KLRF1	-0.849819	7.67707	-3.66711	0.000333502	0.00909625	-0.0739323
CD177	0.621517	4.71196	3.6644	0.000336765	0.00916398	-0.0828471
CSNK1D	0.620896	7.44199	3.65502	0.00034833	0.0094421	-0.113761
PLEKHH2	-0.682914	4.72787	-3.6473	0.000358126	0.00962275	-0.139146
SLC31A2	0.621364	8.11645	3.64462	0.000361593	0.00969375	-0.147962
CTC-471J1.2	-0.650805	5.08805	-3.64233	0.00036457	0.00972667	-0.155464
FGD4	0.651703	6.14067	3.64209	0.00036489	0.00972667	-0.156267
ZNF394	0.614709	8.94477	3.63353	0.000376246	0.00998412	-0.184309
ZNF232	-0.626433	6.33689	-3.62699	0.000385159	0.0101633	-0.205725
PELI2	0.662589	8.40412	3.62658	0.000385719	0.0101666	-0.207054
PROK2	0.641313	8.48909	3.62178	0.000392396	0.0102981	-0.22275
RP11-247L20.4	-0.64124	5.93255	-3.62168	0.000392535	0.0102981	-0.223073
LOC93622	-0.614868	9.52166	-3.60992	0.000409345	0.0106109	-0.261414
TCRVA15 /// TRAV5 /// TRAV5 /// YME1L1	-0.606056	5.87234	-3.60853	0.000411378	0.0106164	-0.265941
SPATA5	-0.784689	5.18062	-3.60817	0.000411912	0.0106164	-0.267128
ATPAF1	-0.599919	7.04561	-3.5886	0.000441583	0.0111522	-0.330692
CHRM3-AS2	-0.709136	7.69337	-3.58785	0.000442756	0.0111522	-0.333114
VWA8	-0.639942	7.88342	-3.58767	0.000443033	0.0111522	-0.333685
LCMT2	-0.614821	6.37559	-3.583	0.000450429	0.0113021	-0.34881
SESN3	0.587111	4.16899	3.58253	0.000451182	0.0113089	-0.350337
DUSP1	0.714386	11.0237	3.57894	0.000456949	0.0113749	-0.361937
BTBD19	0.667207	4.98867	3.57542	0.000462679	0.0114626	-0.373317
GIMAP1-GIMAP5 /// GIMAP5	-0.677716	6.14079	-3.57298	0.000466697	0.0115379	-0.381212
LINC01420	-0.637658	6.02717	-3.56793	0.000475102	0.0117044	-0.397511
CYBRD1	0.598815	4.77954	3.55898	0.000490337	0.0119837	-0.426323
SIK1	0.628672	7.26114	3.55045	0.000505302	0.0122729	-0.453759
KLF12	-0.592344	6.43231	-3.54207	0.000520414	0.0125644	-0.480644
CTA-29F11.1	0.671572	7.24482	3.54061	0.000523089	0.0126117	-0.485321
RP11-373D23.2	0.666015	8.08015	3.51381	0.000574548	0.0135777	-0.570878
TSHZ1	-0.651041	7.59471	-3.50302	0.000596601	0.0139292	-0.605201
NLRC4	0.608563	6.8204	3.48561	0.000633843	0.0146532	-0.660355
CFH	-0.586982	5.51933	-3.48053	0.000645115	0.0148408	-0.676404
NRGN	0.64299	8.25166	3.47442	0.000658909	0.0150258	-0.695663
LOXL1-AS1	-0.616955	6.12528	-3.47106	0.000666626	0.0151535	-0.706261
PKI55	-0.60033	5.95836	-3.47086	0.000667088	0.0151535	-0.706891
CD1D	0.73002	6.90027	3.47022	0.00066858	0.0151582	-0.708924
SGPP1	-0.741372	5.83524	-3.46966	0.000669871	0.0151582	-0.71068
DMXL2	0.692969	8.35135	3.4552	0.000704187	0.0157828	-0.756136
EFCAB7	-0.615024	6.26531	-3.44543	0.000728283	0.0161382	-0.786736
SRGN	0.764322	8.83996	3.44108	0.000739272	0.0163049	-0.800354
IER5	0.610746	8.648	3.44064	0.000740398	0.0163144	-0.801737
GZMK	-0.667964	10.0856	-3.43947	0.000743383	0.0163496	-0.805395
ZNF2	-0.595219	5.6691	-3.43831	0.000746354	0.0163651	-0.809022
GPR174	-0.611266	5.26978	-3.43765	0.000748038	0.0163753	-0.81107
LOC100129518 /// SOD2	0.942342	8.11176	3.43489	0.000755166	0.0164895	-0.819691
MS4A6A	0.775774	7.8131	3.43208	0.000762492	0.0166144	-0.828467
CTB-31O20.2	0.69527	7.4724	3.42497	0.000781303	0.016899	-0.850616
LOC100507459	-0.589129	4.38718	-3.42148	0.000790695	0.0170394	-0.861473
RIN2	0.706266	6.68858	3.41045	0.00082111	0.0174865	-0.895761
TUBB2A	0.9277	7.29888	3.40761	0.000829119	0.0175775	-0.904576
KIF13A	0.730645	6.2414	3.40392	0.000839608	0.0177284	-0.915992
TCRA /// TCRA /// TRA /// TRAV17 /// TRAV17 /// TRD /// YME1L1	-0.587576	6.51319	-3.38894	0.000883571	0.0183119	-0.962322
ZNF880	-0.617968	5.06143	-3.37325	0.00093188	0.0190047	-1.01062
TCR-alpha /// TRAV12-3 /// TRAV12-3 /// YME1L1	-0.619958	6.82214	-3.37321	0.000932007	0.0190047	-1.01074
RNF144B	0.695427	8.9968	3.3681	0.000948302	0.0192369	-1.02646
XIST	-1.69762	5.86615	-3.3675	0.000950222	0.0192426	-1.0283
CREG1	0.659735	8.90541	3.36374	0.000962393	0.0193889	-1.03984
LYRM7	-0.597361	7.87267	-3.35794	0.000981432	0.0197049	-1.0576
DYNLL1	-0.606089	10.0495	-3.34259	0.00103357	0.020352	-1.10451
DNM3	-0.640741	5.40413	-3.34034	0.00104142	0.0204381	-1.11136
CPD	0.629672	8.01681	3.33726	0.00105227	0.0205831	-1.12075
MLLT10	-0.610154	6.96604	-3.33376	0.00106469	0.0207562	-1.13138
SEC62	-0.697746	6.60612	-3.3316	0.00107245	0.0208901	-1.13796
TRMT1L	-0.658951	7.27029	-3.32735	0.00108788	0.0210511	-1.15089
AUTS2	-0.595251	8.17914	-3.32193	0.00110782	0.0212967	-1.16734
ZBTB4	-0.59254	10.3183	-3.30867	0.00115804	0.0219925	-1.20747
ZNF204P	-0.656256	5.43648	-3.30111	0.00118767	0.0224123	-1.23032
TRDV3	-0.731673	8.15814	-3.29804	0.00119988	0.0225863	-1.23957
BACH2	-0.627332	7.23768	-3.29346	0.00121831	0.0228966	-1.25336
mir-223	0.749361	7.16567	3.2922	0.00122342	0.0229194	-1.25714
CCL4	0.713454	8.89769	3.27347	0.00130196	0.0239705	-1.31339
ZNF566	-0.660144	4.69317	-3.26699	0.00133016	0.024332	-1.33275
FCGR3A /// FCGR3B	0.644116	8.15545	3.26604	0.00133436	0.0243762	-1.3356
TGFBI	0.597633	8.29769	3.2585	0.00136803	0.0248945	-1.35811
TMEM60	-0.590102	7.90029	-3.2538	0.00138946	0.0251478	-1.37214
LINC01366	0.592534	4.67478	3.25031	0.00140553	0.0253027	-1.38252
DEFA1 /// DEFA1B /// DEFA3	0.937799	8.30626	3.23756	0.00146575	0.0259889	-1.42039
RP11-395I6.3	-0.615936	5.55103	-3.23475	0.00147938	0.0261321	-1.42874
RP4-773N10.4	-0.599469	6.08064	-3.23081	0.00149861	0.0263726	-1.44039
PPARGC1B	-0.635214	5.80381	-3.22968	0.00150418	0.0264311	-1.44374
TDRD9	0.650409	6.20198	3.21878	0.00155888	0.0270087	-1.47595
THYN1	-0.589541	7.92505	-3.21773	0.00156426	0.0270458	-1.47906
CCR2	-0.738783	9.25428	-3.21458	0.00158045	0.0272021	-1.48834
CXCL3	0.621384	5.77478	3.21001	0.00160421	0.0274902	-1.50179
SLC25A45	-0.630651	6.90615	-3.20817	0.0016139	0.027561	-1.50722
ZNF189	-0.591925	7.19348	-3.18568	0.00173653	0.0288441	-1.57319
CSRNP2	-0.617382	6.42595	-3.1814	0.00176084	0.0291955	-1.58571
MPEG1	0.878699	8.59787	3.1429	0.00199395	0.0319215	-1.69754
TUBB6	0.59038	5.48225	3.13267	0.00206058	0.0326019	-1.72708
BCL11B	-0.592403	9.02273	-3.11144	0.00220538	0.0342474	-1.78806
PTPRE	0.585972	6.60484	3.10566	0.00224645	0.0346682	-1.80462
CTD-2292M16.8	-0.728703	6.2703	-3.09275	0.00234063	0.0356185	-1.84146
PDGFC	0.657269	6.29949	3.0697	0.00251794	0.0375869	-1.90691
CTD-2124B8.2	-0.5864	5.73491	-3.05927	0.00260219	0.0385022	-1.93638
ASH1L-AS1	0.615288	6.88242	3.05574	0.00263127	0.0388061	-1.94633
RECQL5	-0.802761	4.88388	-3.05558	0.00263262	0.0388061	-1.94679
CXCR4	0.591381	9.6335	3.03373	0.00281954	0.0403962	-2.00817
UBE3D	-0.644907	5.16451	-3.03177	0.00283692	0.0404972	-2.01366
SLC26A8	0.626539	5.18801	3.02597	0.00288886	0.0409023	-2.02989
TTTY15	0.640599	5.77336	3.00908	0.00304517	0.0422889	-2.07698
S1PR3	0.631133	5.04713	2.97788	0.00335451	0.0454362	-2.16333
CNTNAP3 /// CNTNAP3B /// CNTNAP3P2	0.679496	6.46376	2.95583	0.00359018	0.0471031	-2.22386
FGL2	0.617125	8.30268	2.94509	0.0037105	0.0481178	-2.25321
TLR1	0.631066	7.54417	2.84625	0.00500367	0.0580924	-2.51876
TFEC	0.643937	6.29413	2.84233	0.00506262	0.0586052	-2.52914
CTD-2555O16.4 /// MTHFD1	-0.585954	5.18116	-2.77227	0.00622768	0.067527	-2.71219
TREML4	0.617902	6.61917	2.69788	0.00772693	0.0783381	-2.90201
STEAP4	0.605603	6.01353	2.58847	0.0105283	0.0952412	-3.17264
EIF1AY	1.07531	7.09995	2.53144	0.0123243	0.105247	-3.30964
PTGS2	0.711521	7.46719	2.45283	0.0152475	0.120779	-3.49384
KDM5D	0.932671	7.58495	2.1883	0.0300977	0.181201	-4.07399
RPS4Y1	1.00909	9.28707	2.16927	0.0315386	0.186683	-4.11334
