# Supplementary material for: Identification and validation of apoptosis-related genes in acute myocardial infarction based on integrated bioinformatics methods
Source: PeerJ. 2024 Dec 4;12:e18591. doi: 10.7717/peerj.18591 (PMC11624842; doi:10.7717/peerj.18591)
Supplement: Supplemental Information 7 [file peerj-12-18591-s007.xls]

## Sheet: Sheet1
		CT-CDKN1A	CT-GAPDH			CT-PMAIP1	CT-GAPDH			CT-IL1B	CT-GAPDH
	Sham	29.02	17.02		Sham	30.92	16.72		Sham	29.1	16.73
		28.48	16.36			30.12	16.22			27.87	16.61
		28.8	16.97			29.08	16.63			27.88	17.14
		28.28	16.22			29.64	16.38			28.27	17.14
		28.4	17.1			30.58	16.89			27.98	16.86
		28.36	17.31			30.23	16.14			27.94	16.14
	AMI	28.08	17.48		AMI	27.53	17.08		AMI	23.41	17.6
		27.28	16.52			26.82	16.45			24.22	17.4
		27.37	18.16			27.89	17.11			24.26	17.64
		28.66	18.43			28.7	17.94			25.14	17.95
		26.89	18.38			28.44	17.53			24.93	16.95
		28.67	17.89			28.32	17.69			24.1	16.78
		CT-CD14	CT-GAPDH			CT-BCL10	CT-GAPDH			CT-GNA15	CT-GAPDH
	Sham	24.48	16.73		Sham	22.58	17.02		Sham	28.58	16.73
		24.32	16.61			22.16	16.36			28.08	16.61
		24.57	17.14			22.12	16.32			27.5	17.14
		25.25	16.86			22.37	16.22			27.92	17.14
		24.69	16.14			22.12	16.31			28.58	16.86
		23.72	16.32			22.09	16.86			28.43	16.32
	AMI	23.35	17.6		AMI	22.91	17.48		AMI	28.61	17.6
		23.59	17.4			22.24	16.52			28.06	17.4
		22.66	17.64			22.24	16.78			28.17	17.64
		24	17.95			22.89	16.87			28.27	17.95
		24.27	17.19			22.28	16.95			27.89	16.56
		23.43	16.78			22.02	16.56			28.43	16.78
